# Supplementary material
Source: HighWire-hosted journal article supplement (https://bmjopen.bmj.com/content/14/6/e077108)
Supplement: inline-supplementary-material-1 [file inline-supplementary-material-1.pdf]

**Supplemental Table S1** Search strategy for studies on ADCs in solid tumours

| Database | Search Period           | Search Terms                                                                                                                                                     |
|----------|-------------------------|------------------------------------------------------------------------------------------------------------------------------------------------------------------|
| Pubmed   | 2000 to 18 October 2023 | 1. antibody-drug conjugates<br>2. solid cancer<br>3. approve<br>4. clinical trials<br>5. quality of life<br>6. follow-up survival<br>7. updated overall survival |
